# Supplementary material for: Single-Walled Carbon Nanotubes with Red Phosphorus in Lithium-Ion Batteries: Effect of Surface and Encapsulated Phosphorus
Source: MDPI journal article supplement (doi:10.3390/nano13010153), 2022-12-29
Supplement: s1 [file s1]

# Single-Walled Carbon Nanotubes with Red Phosphorus in Lithium-Ion Batteries: Effect of Surface and Encapsulated Phosphorus

Anna A. Vorfolomeeva<sup>1</sup>, Svetlana G. Stolyarova<sup>1</sup>, Igor P. Asanov<sup>1</sup>, Elena V. Shlyakhova<sup>1</sup>, Pavel E. Plyusnin<sup>1</sup>, Evgeny A. Maksimovskiy<sup>1</sup>, Evgeny Yu. Gerasimov<sup>2</sup>, Andrey L. Chuvilin<sup>3,4</sup>, Alexander V. Okotrub<sup>1</sup> and Lyubov G. Bulusheva<sup>1,\*</sup>

<sup>1</sup> Nikolaev Institute of Inorganic Chemistry SB RAS, 3 Acad. Lavrentiev Ave., 630090 Novosibirsk, Russia

<sup>2</sup> Boreskov Institute of Catalysis, SB RAS, 5 Acad. Lavrentiev Ave., 630090 Novosibirsk, Russia

<sup>3</sup> CIC NanoGUNE BRTA, Tolosa Hiribidea 76, E-20018 Donostia-San Sebastián, Spain

<sup>4</sup> IKERBASQUE, Basque Foundation of Science, Maria Diaz de Haro 3, E-48013 Bilbao, Spain

\* Correspondence: bul@niic.nsc.ru; Tel.: +73-8333-053-52

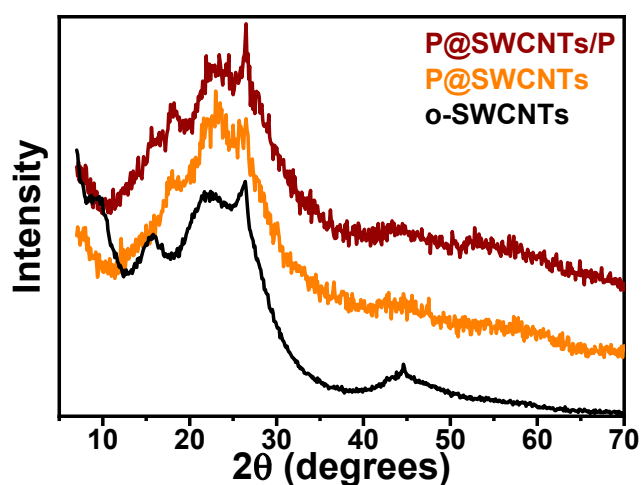

Figure S1. XRD patterns measured for initial o-SWCNTs and P@SWCNTs/P, P@SWCNTs samples.

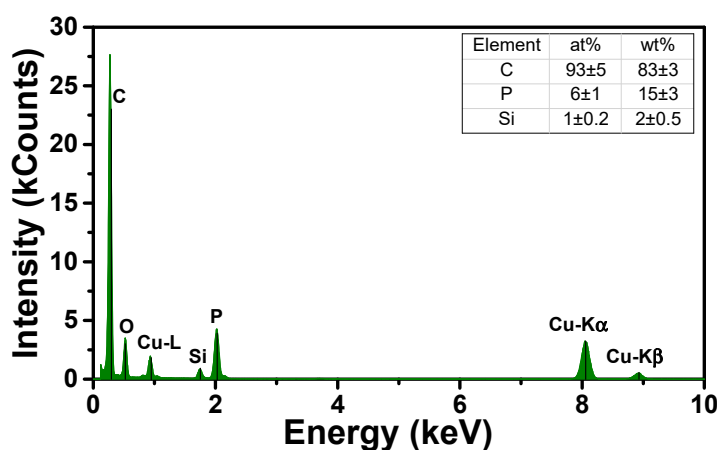

Figure S2. EDS analysis of P@SWCNTs sample. The spectrum and content of the main elements (inserted table). Cu and O are associated with the TEM grid, Si is impurity from the quartz ampoule.

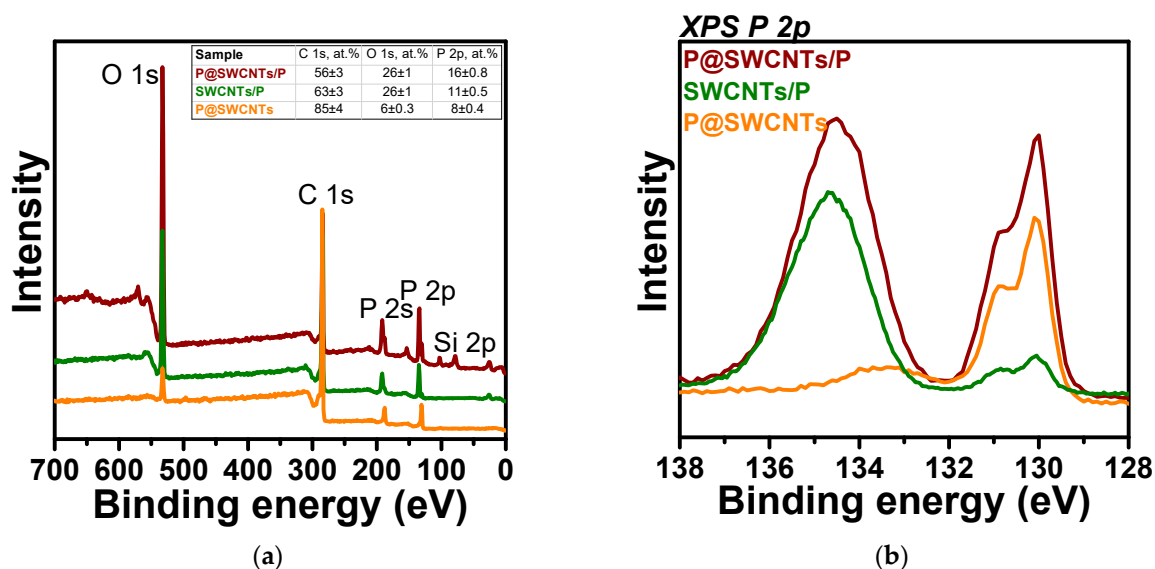

**Figure S3.** (a) Survey XPS spectra and (b) XPS P 2p spectra of P@SWCNTs (encapsulated phosphorus), SWCNTs/P (external phosphorus), and P@SWCNTs/P (encapsulated and external phosphorus). Inset shows the concentrations of carbon, oxygen, and phosphorus in the samples.

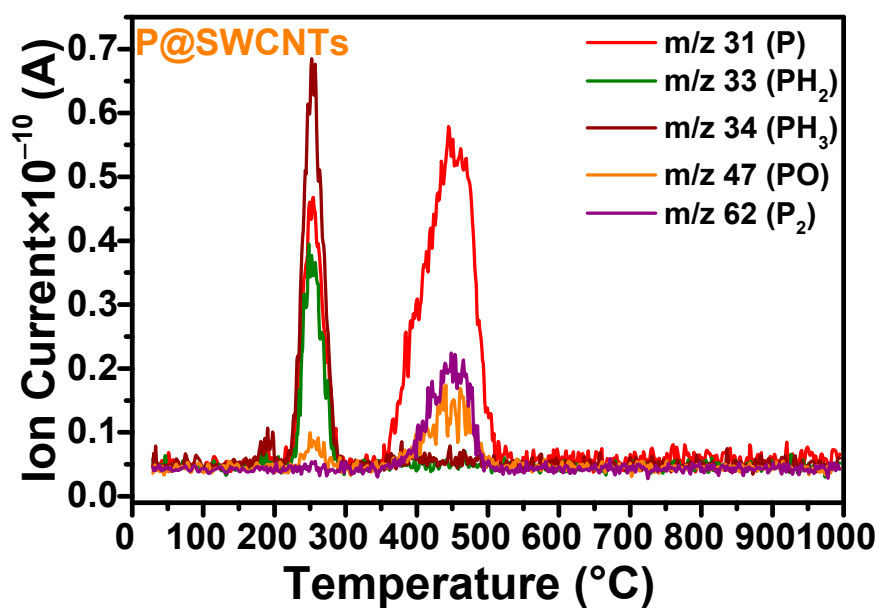

**Figure S4.** Ion current curves of evolved gases during decomposition of P@SWCNTs sample.

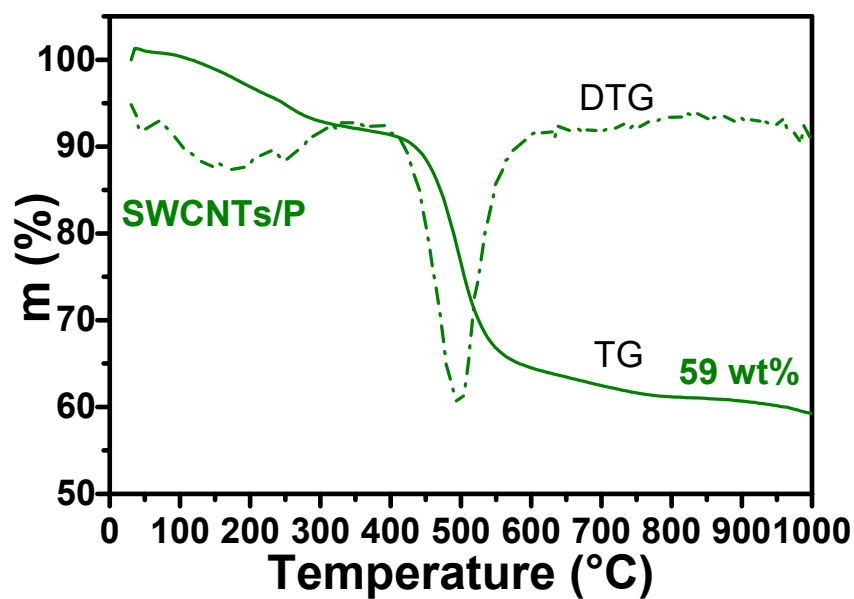

**Figure S5.** TG and DTG curves measured for SWCNTs/P in helium.

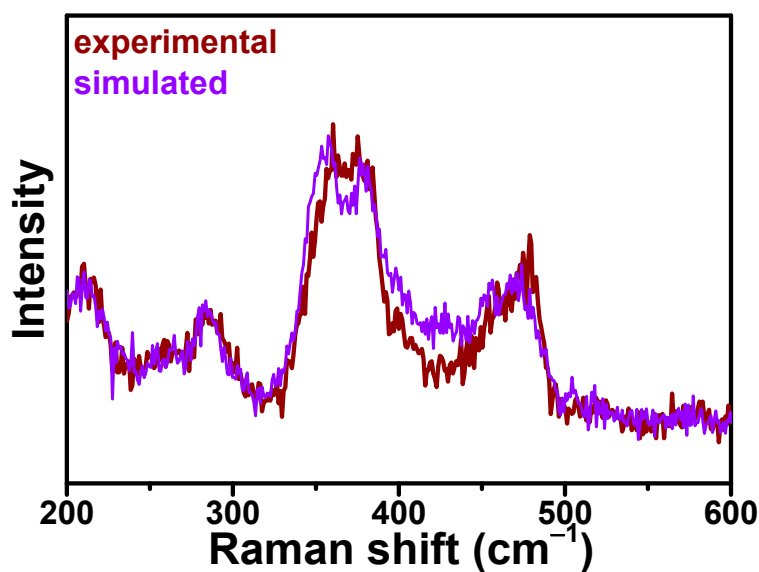

**Figure S6.** Experimental Raman spectrum of P@SWCNTs/P and the spectrum simulated using the spectra of recrystallized phosphorus  $P_{re}$  and P@SWCNTs in a ratio of 0.3 to 1.1.

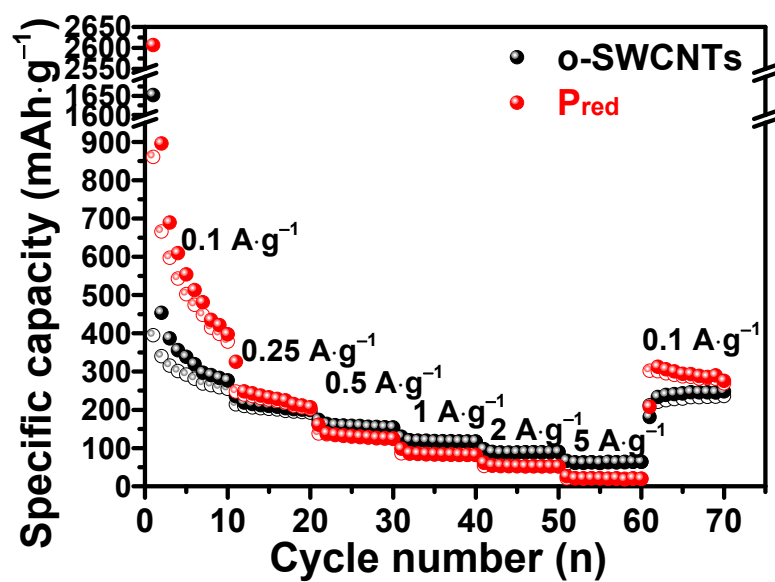

Figure S7. Rate performance of o-SWCNTs and commercial red phosphorus ( $P_{red}$ ).

**Table S1.** Electrochemical performance of P–CNT composites in lithium-ion batteries.

| Sample           | Synthesis                                                          | P content | Current density, A g <sup>-1</sup> | Specific capacity (mAh g <sup>-1</sup> ) of carbon | Specific capacity (mAh g <sup>-1</sup> ) based on the composite mass | Specific capacity (mAh g <sup>-1</sup> ) based on the phosphorus mass | Cycle performance                                                           | Reference |
|------------------|--------------------------------------------------------------------|-----------|------------------------------------|----------------------------------------------------|----------------------------------------------------------------------|-----------------------------------------------------------------------|-----------------------------------------------------------------------------|-----------|
| P-SCNT           | vaporization-condensation (vacuum, 700 °C, 4 h)                    | 36 wt%    | 0.1                                | ~400                                               | 1398                                                                 | –                                                                     | 1400 mAh g <sup>-1</sup> at 100 mA g <sup>-1</sup> after 200 cycles         | 29        |
|                  |                                                                    |           | 2                                  |                                                    | 782                                                                  | –                                                                     |                                                                             |           |
| P-CNT            | ball-milling (Ar, 500 rpm, 40 h)                                   | ?         | 0.78                               | ~70                                                | –                                                                    | 1771                                                                  | 1844 mAh g <sup>-1</sup> at 780 mA g <sup>-1</sup> after 300 cycles         | 17        |
|                  |                                                                    |           | 3.90                               |                                                    | –                                                                    | 1081                                                                  |                                                                             |           |
| ARPC-48          | ball-milling (Ar, 450 rpm, 48 h)                                   | ?         | 0.016 (0.01 C)                     | ?                                                  | 1994 (не указано)                                                    |                                                                       | 999 mAh g <sup>-1</sup> at 0.05 C after 50 cycles                           | 2         |
|                  |                                                                    |           | 0.8 (0.5 C)                        | ?                                                  | 817                                                                  |                                                                       |                                                                             |           |
| P@CNT            | solution-based method, ultrasonicated 5 min at room temperature    | 72 wt%    | 0.2                                | 235–178                                            | 1082                                                                 | 1997–1264                                                             | 736 mAh g <sup>-1</sup> at 1000 mA g <sup>-1</sup> after 450 cycles         | 79        |
|                  |                                                                    |           | 10                                 | –                                                  | 784                                                                  | –                                                                     |                                                                             |           |
| P@DMWCNTs        | gas-phase synthesis (vacuum, 550 °C, 10 h)                         | 58 wt%    | 0.025                              | ~350                                               | ~500                                                                 | 834                                                                   | 834 mAh g <sup>-1</sup> at 25 mA g <sup>-1</sup> after 50 cycles            | 41        |
| PP@MWCNTs        | solution-based method (Ar, 189 °C, 8 h)                            | 32 wt%    | 0.1                                | ?                                                  | –                                                                    | 886                                                                   | 886 mAh g <sup>-1</sup> at 100 mA g <sup>-1</sup> after 500 cycles          | 39        |
|                  |                                                                    |           | 3                                  | ?                                                  | –                                                                    | ~400                                                                  |                                                                             |           |
| r-P@MWCNTs       | vaporization-condensation (vacuum, 500 °C, 48 h, gradient cooling) | 16 wt%    | 0.1                                | ~500                                               | 446                                                                  | –                                                                     | 444 mAh g <sup>-1</sup> at 500 mA g <sup>-1</sup> after 500 cycles          | 44        |
|                  |                                                                    |           | 3                                  | ~300                                               | 246                                                                  | –                                                                     |                                                                             |           |
| RP-on-r-P@MWCNTs | vaporization-condensation (vacuum, 500 °C, 48 h, natural cooling)  | 72 wt%    | 0.1                                | ~500                                               | 780                                                                  | –                                                                     | <444 mAh g <sup>-1</sup> at 500 mA g <sup>-1</sup> after 500 cycles         | 44        |
|                  |                                                                    |           | 3                                  | ~300                                               | ~700                                                                 | –                                                                     |                                                                             |           |
| P-MWCNTs         | wet ball-milling (Ar, 650 rpm, 7 h)                                | ?         | 0.05                               | 143                                                | 1615                                                                 | –                                                                     | 1397 mAh g <sup>-1</sup> at 50 mA g <sup>-1</sup> after 50 cycles           | 20        |
|                  |                                                                    |           | 1                                  | –                                                  | 934                                                                  | –                                                                     |                                                                             |           |
| RP NPs/MWNT      | solution-based method (100 °C, 2 h)                                | 56 wt%    | 0.2                                | ?                                                  | 1612                                                                 | –                                                                     | 1577 mAh g <sup>-1</sup> at 200 mA g <sup>-1</sup> after 100 cycle          | 80        |
|                  |                                                                    |           | 3                                  | ?                                                  | ~1200                                                                | –                                                                     |                                                                             |           |
| P–SWCNT          | hand-grinding; vaporization-condensation at 600 °C, 2 h            | 60 wt%    | 0.05                               | ~130 at 150 mA/g                                   | 434                                                                  | –                                                                     | 398 mAh g <sup>-1</sup> at 150 mA g <sup>-1</sup> after 100 cycles          | 40        |
|                  |                                                                    |           | 1                                  | –                                                  | 160                                                                  | –                                                                     |                                                                             |           |
| SWCNT/P          | Hand-grinding, vaporization-condensation at 600 °C, 2h             | 70 wt%    | 0.05                               | –                                                  | 800                                                                  | –                                                                     | ~350 mAh g <sup>-1</sup> at 50 mA g <sup>-1</sup> on 80 <sup>th</sup> cycle | 81        |
| P@SWCNTs         | vaporization-condensation (vacuum, 800 °C, 48 h, natural cooling)  | 28 wt%    | 0.1 A/g                            | 245                                                | 609                                                                  | 1545                                                                  | 317 mAh g <sup>-1</sup> at 5000 mA g <sup>-1</sup> after 1000 cycles        | This work |
|                  |                                                                    |           | 5 A/g                              | 61                                                 | 328                                                                  | 1006                                                                  |                                                                             |           |
| P@SWCNTs/P       |                                                                    | 51 wt%    | 0.1 A/g                            | 245                                                | 578                                                                  | 900                                                                   | 248 mAh g <sup>-1</sup> at 5000 mA g <sup>-1</sup> after 1000 cycles        |           |
|                  |                                                                    |           | 5 A/g                              | 61                                                 | 279                                                                  | 486                                                                   |                                                                             |           |
